# Supplementary material for: Gold-Nanoparticle-Enhanced Radio-Fluorogenic Hydrogel Sensor for Low Radiation Doses in Clinical Radiotherapy
Source: MDPI journal article supplement (doi:10.3390/polym14224841), 2022-11-10
Supplement: s1 [file s1]

## Supporting Information

### Gold Nanoparticle-Enhanced Radio-Fluorogenic Hydrogel Sensor for Low Radiation Dose in Clinical Radiotherapy

Xingyu Dong<sup>†</sup>, Yuan Tian<sup>†</sup>, Fengqing Wang, Chong Chen, Yunlong Wang\*, and Jun Ma\*

College of Materials Science and Technology, Nanjing University of Aeronautics and Astronautics Nanjing 211106, P. R. China.

Correspondence: authors: wylong@nuaa.edu.cn; junma@nuaa.edu.cn

<sup>†</sup>These authors contributed equally to this work.

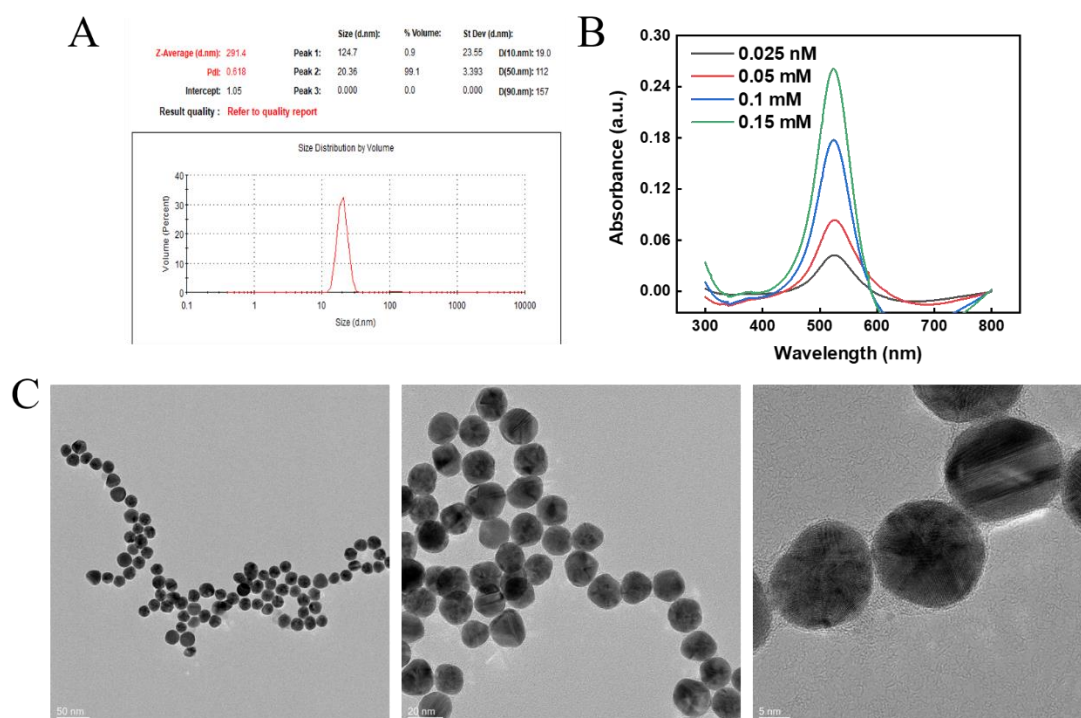

**Supplementary Figure S1.** Relevant characterisation of the synthesised GNPs. A: Dynamic light scattering from GNPs. B: UV-vis on spectra of different concentrations of GNPs. C: TEM image of GNPs.

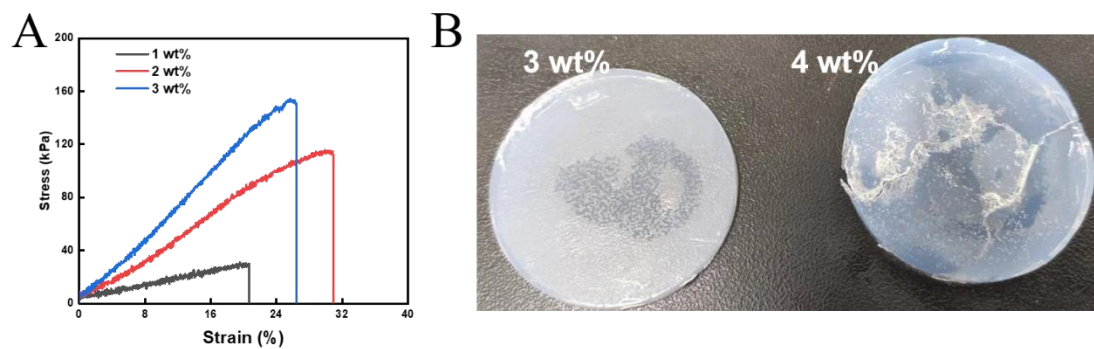

**Figure S2.** Effect of mass fraction of agarose hydrogels on gel properties. A: Stress-strain curve of hydrogels with different mass fractions. B: The digital photos of gels with a mass fraction of 3% and 4% after demoulding, respectively.
